# Supplementary material
Source: JCI journal article supplement (doi:10.1172/jci166833)
Supplement: sd1 [file 1]

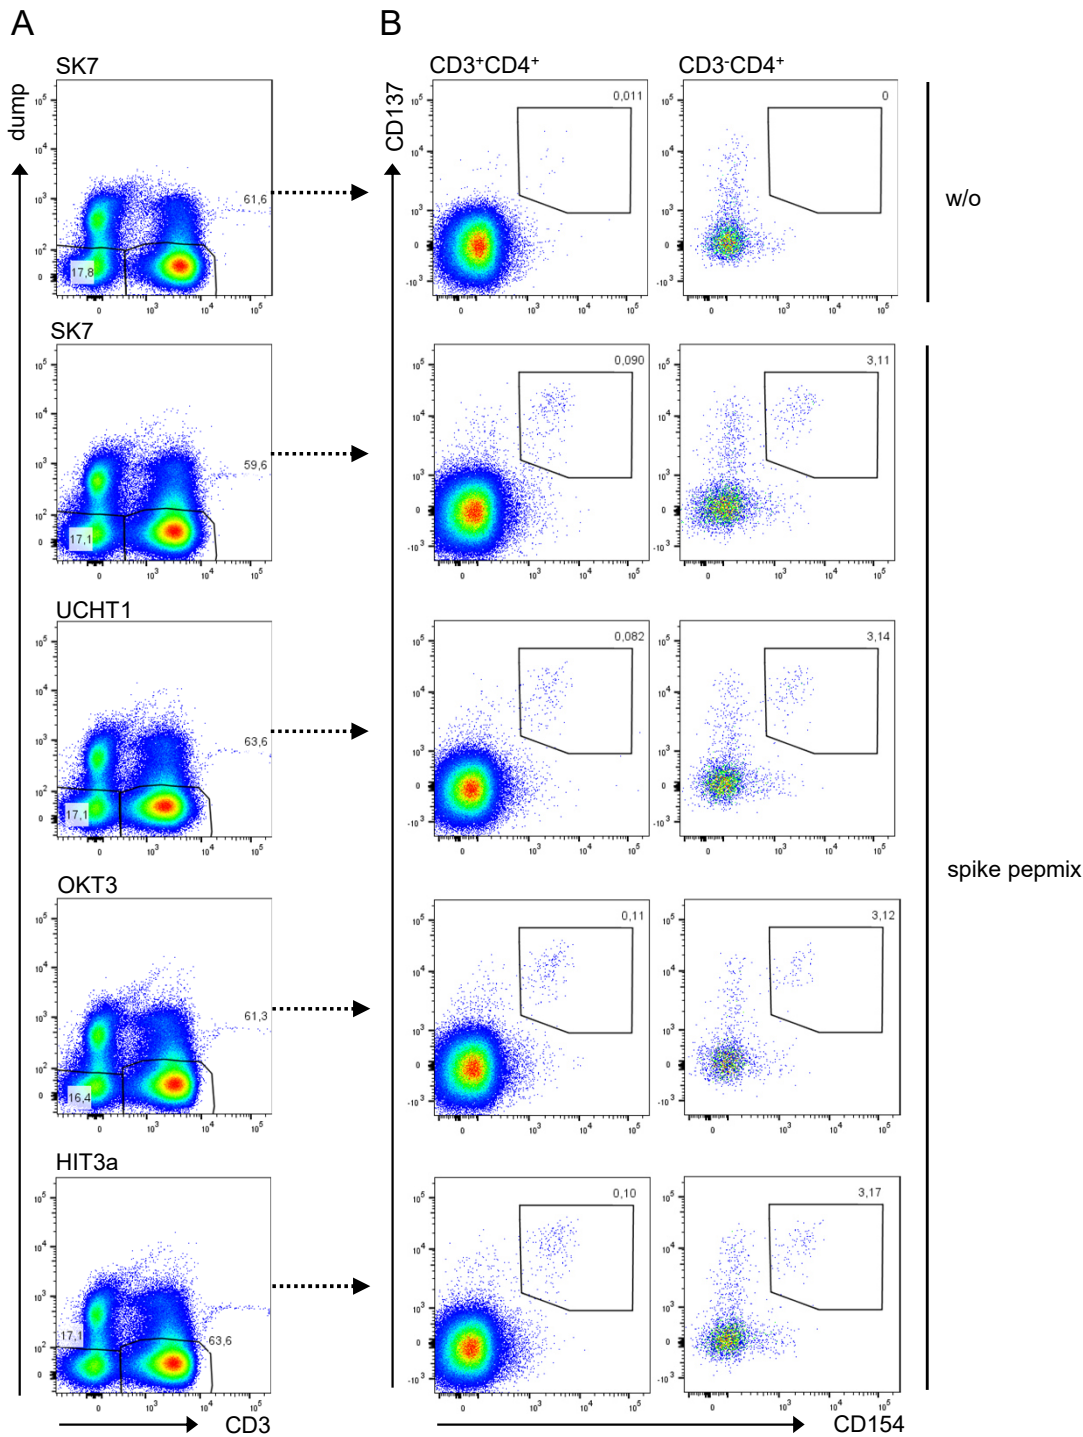

*Identification of spike-specific CD3<sup>+</sup>CD4<sup>+</sup> and CD3<sup>-</sup>CD4<sup>+</sup> populations with four different, commonly available anti-CD3 clones.* 10<sup>7</sup> PBMC were stimulated in one tube with spike pepmix. Thereafter, cells were split into four and separately stained with the complete surface panel, each including one of the depicted anti-CD3 PerCP-Cy5.5 conjugated clones (SK7, UCHT1, OKT3, HIT3a), respectively. Unstimulated cells served as control and were stained with a surface panel including anti-CD3 clone SK7. (A) Exemplary CD3 stainings for all four clones, showing similar brightness and population shapes, allowing consistent inter-sample gating. (B) After fixation, permeabilization and intracellular staining, spike-specific cells were identified after pre-gating on CD4 (not shown) as before according to CD154/CD137 co-expression. Plots show similar frequencies of specific T cells within the CD3<sup>+</sup>CD4<sup>+</sup> and CD3<sup>-</sup>CD4<sup>+</sup> populations, respectively, regardless of the anti-CD3 clone used. Data are representative for four different donors collected in two independent experiments.

## Supplemental Figure 2, Sattler et al.

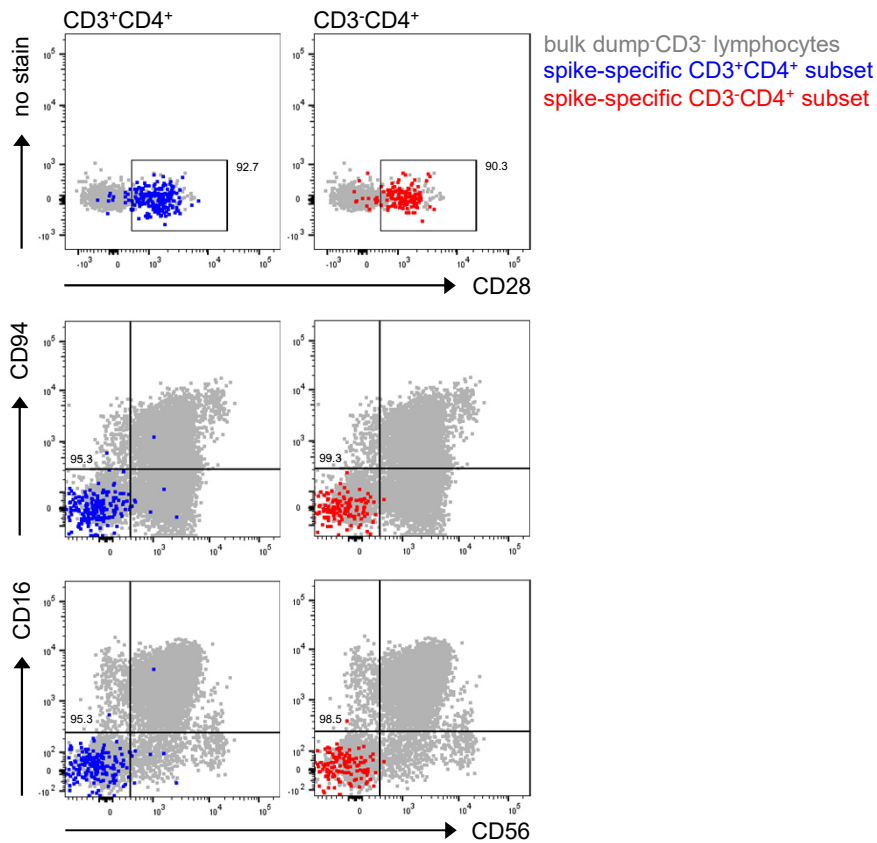

*Spike-induced CD3<sup>-</sup>CD4<sup>+</sup> cells are bona fide T cells.* PBMC were stimulated with spike peptide mix, stained and pre-gated as before. Expression of the T cell co-stimulator CD28 or the NK cell associated markers CD56, CD94 and CD16 was analyzed in both spike-specific CD3<sup>+</sup>CD4<sup>+</sup> (blue dots) and CD3<sup>-</sup>CD4<sup>+</sup> (red dots) populations. In all experiments, the bulk CD3<sup>-</sup>dump<sup>-</sup> lymphocyte population (grey) served as internal control. Specific cells were largely CD28<sup>+</sup> and devoid of NK cell markers, suggesting no contamination with non-T cells. Data are representative for 4 different donors collected in two independent experiments.

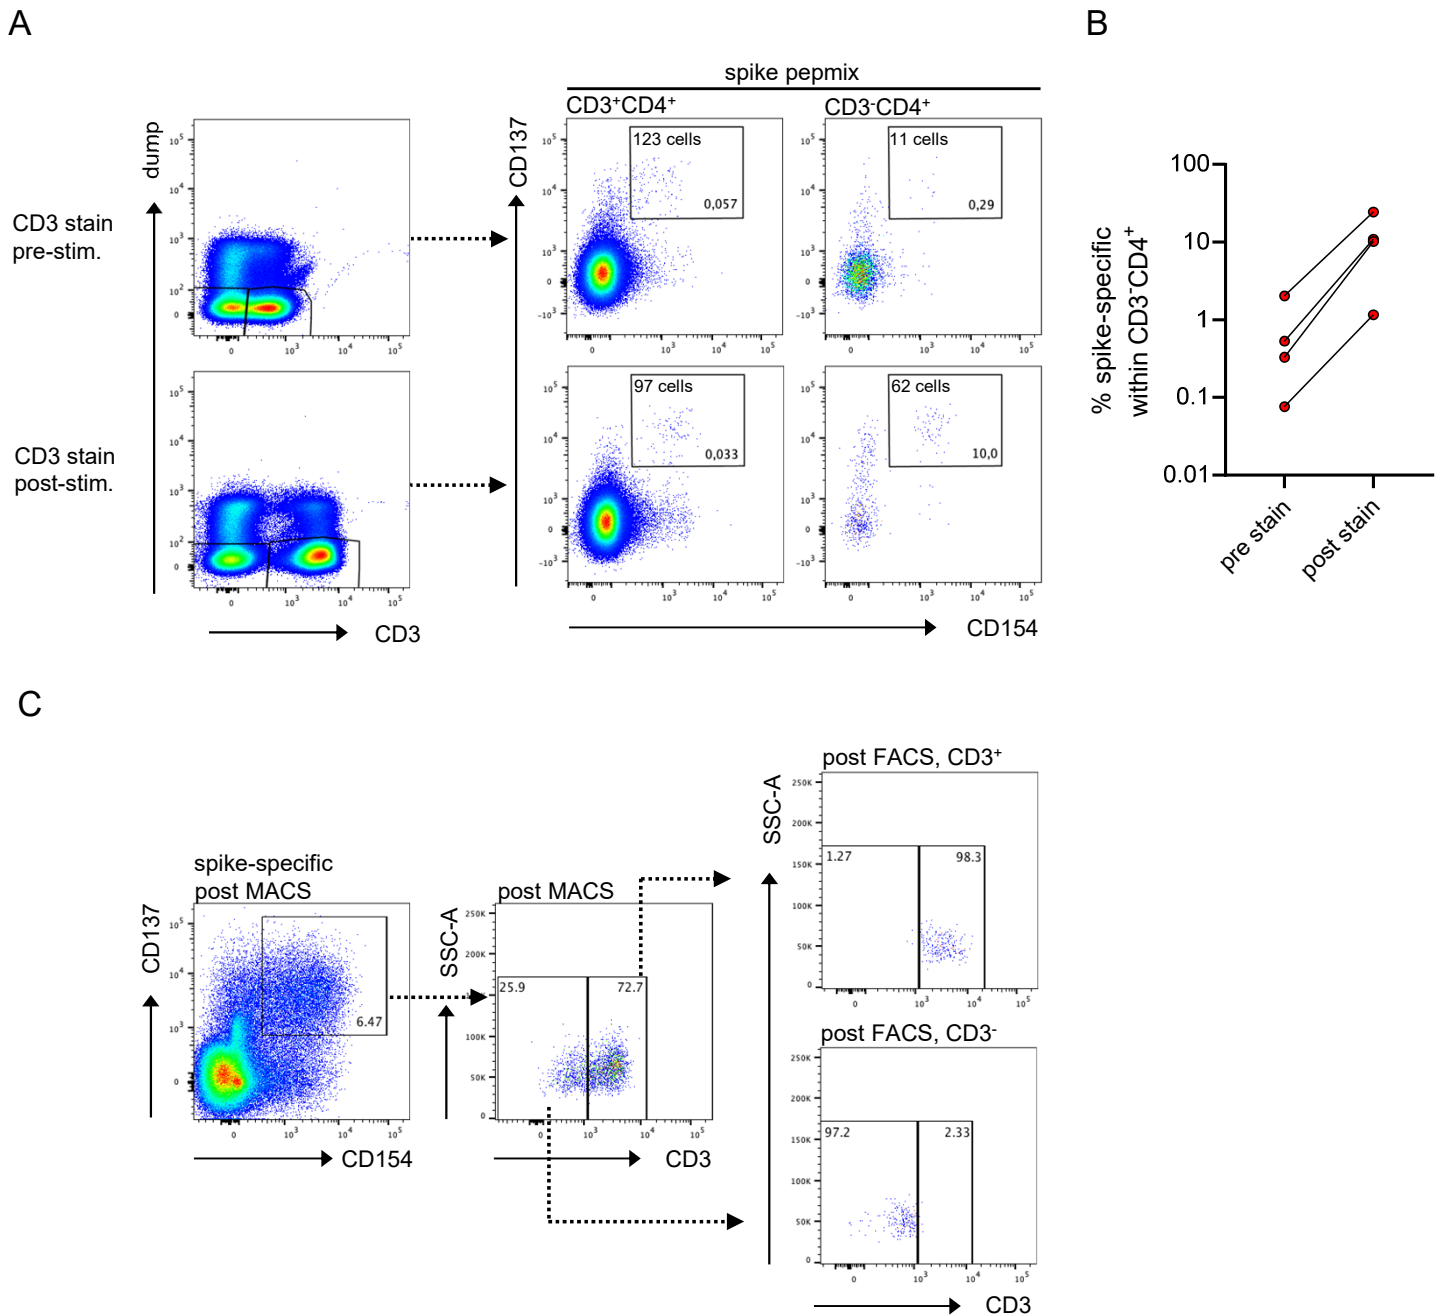

*Stimulation-induced downregulation of CD3 in vaccine-specific Th cells.* PBMC were surface stained for CD3 pre- or post-stimulation with spike pepmix as indicated. Frequencies (A and B) and counts (A) of vaccine-specific T cells were detected according to CD154 and CD137 co-expression within the CD3<sup>+</sup>CD4<sup>+</sup> and CD3<sup>-</sup>CD4<sup>+</sup> compartments. (C) Exemplary sorting strategy for spike-specific CD3<sup>-</sup>CD4<sup>+</sup> and CD3<sup>+</sup>CD4<sup>+</sup> Th cell subsets using MACS-pre-enrichment, followed by FACS purification, including post-FACS re-analysis.

Supplemental Figure 4, Sattler et al.

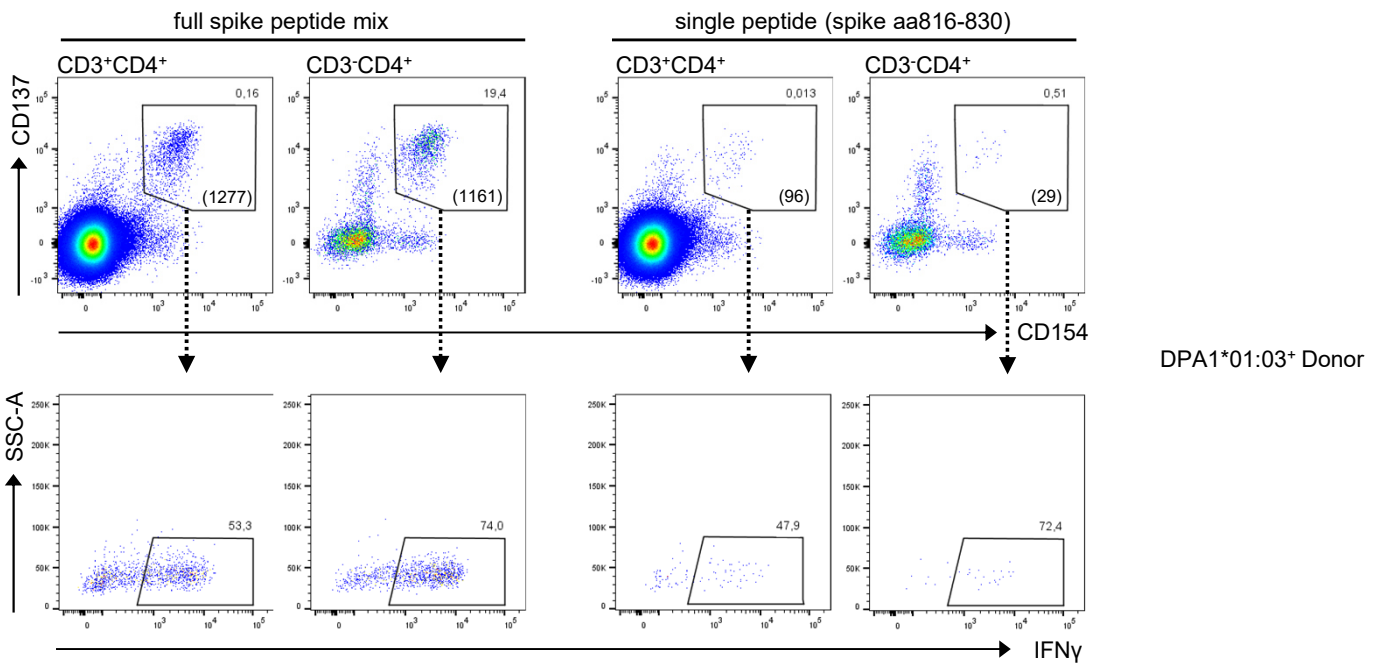

*Spike derived single peptide response (aa816-830) in CD3<sup>+</sup>CD4<sup>+</sup> and CD3<sup>-</sup>CD4<sup>+</sup> subsets.* PBMC of a HLA-DPA1\*01:03<sup>+</sup> Donor were stimulated with complete spike peptide mix or with a single spike-derived 15-mer (aa816-830) at 0.5  $\mu$ g/ml per peptide as indicated. Frequencies and counts (in brackets) of specific CD154<sup>+</sup>CD137<sup>+</sup> T cells were determined in both CD3<sup>+</sup>CD4<sup>+</sup> and CD3<sup>-</sup>CD4<sup>+</sup> subpopulations, along with quantification of IFN $\gamma$  production.

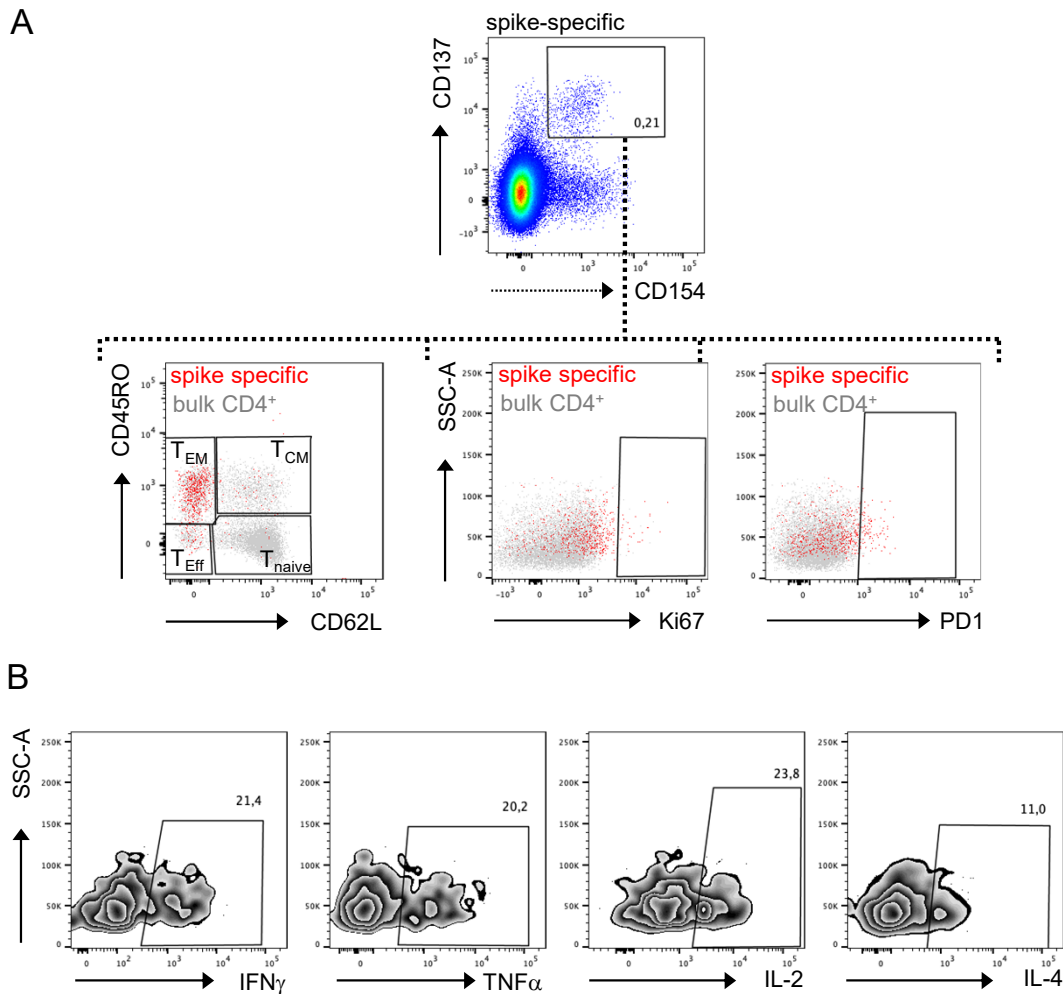

*Phenotypic and functional assessment of antigen-reactive Th cell subsets.* Exemplary gating strategy to quantify frequencies of (A) naïve/memory T cells according to CD45RO and CD62L expression (left; TEM - effector/memory-, TCM – central memory-, TEff – effector- and Tnaive – naïve Th cells), or Ki67 (middle) or PD1 (right) or (B) cytokine expressing Th cells within the antigen-specific CD154<sup>+</sup>CD137<sup>+</sup> populations, equally accounting for both CD3-CD4<sup>+</sup> and CD3<sup>+</sup>CD4<sup>+</sup> Th cell subsets.

Supplemental Figure 6, Sattler et al.

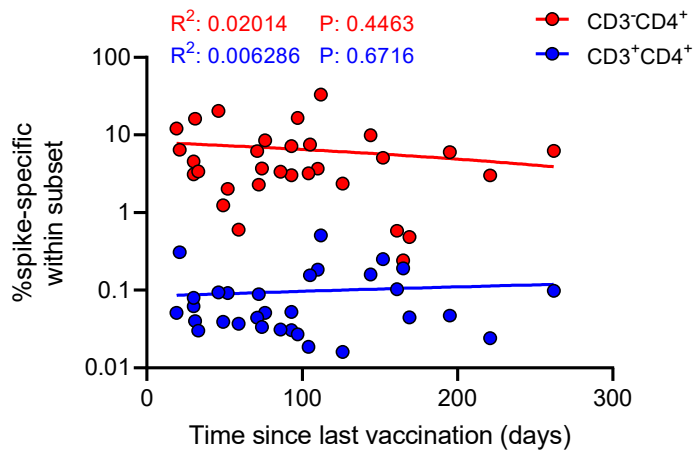

*Correlation of spike-specific T cell frequencies with time since last vaccination.* Spike-specific CD3<sup>+</sup>CD4<sup>+</sup> and CD3<sup>-</sup>CD4<sup>+</sup> T cells were identified as before in healthy virus-naïve probands in the follow-up period after SARS-CoV2 vaccination. Frequencies were plotted against days since last vaccine dose. Data derived from n=31 virus-naïve individuals. Statistical analyses were performed using simple linear regression.

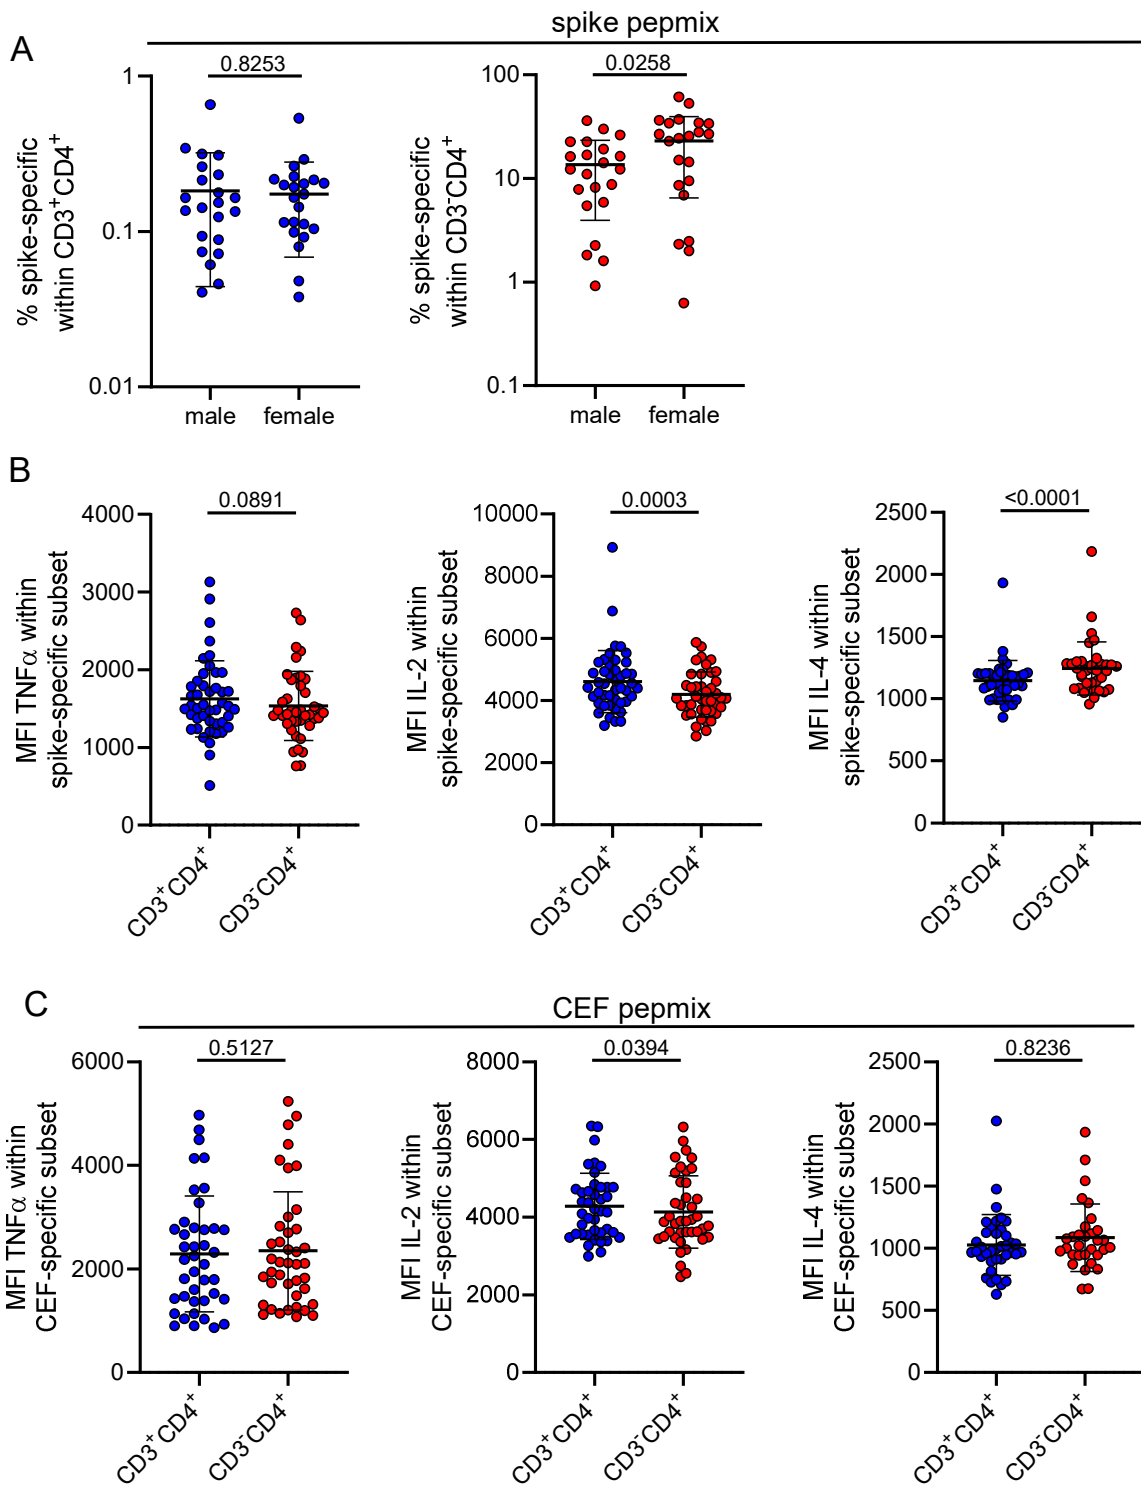

*Sex distribution and per-cell cytokine expression levels of specific CD3<sup>-</sup>CD4<sup>+</sup> and CD3<sup>+</sup>CD4<sup>+</sup> Th cell subsets.* Spike-specific Th cells were identified as before; frequencies of CD3<sup>-</sup>CD4<sup>+</sup> and CD3<sup>+</sup>CD4<sup>+</sup> subsets were quantified in probands stratified according to male (n=22) and female (n=22) sex. (B) Per-cell expression levels of TNF $\alpha$ , IL-2 and IL-4 according to MFI levels in spike-specific CD3<sup>-</sup>CD4<sup>+</sup> and CD3<sup>+</sup>CD4<sup>+</sup> Th cell subsets (n=42). (D) Per-cell expression levels of TNF $\alpha$ , IL-2 and IL-4 according to MFI levels in CEF-specific CD3<sup>-</sup>CD4<sup>+</sup> and CD3<sup>+</sup>CD4<sup>+</sup> Th cell subsets (n=41). Statistical analysis in (A) using unpaired Mann-Whitney-test and in (B) and (D) using paired, two-tailed Wilcoxon test. Where applicable, graphs show means  $\pm$  SD.
